# Supplementary material for: The Impact of Feed Composition on Entrainer Selection in the Extractive Distillation Process
Source: MDPI journal article supplement (doi:10.3390/pr12040764), 2024-04-10
Supplement: s1 [file s1]

# Supporting Information

## The Impact of Feed Composition on Entrainer Selection in the Extractive Distillation Process

Qunsheng Li<sup>1,2</sup>, Qingpeng Wu<sup>1,2</sup>, Shuang Zhao<sup>1,2</sup>, Yiwen Pang<sup>1,2</sup>, Zhe Yang<sup>\*3</sup>, Nan Hu<sup>\*1,2</sup>

<sup>1</sup> State Key Laboratory of Chemical Resource Engineering, Beijing University of Chemical Technology, Beijing 100029, China

<sup>2</sup> Engineering Research Center of Preparation Technology of Ultra-Pure Chemicals for Integrated Circuits, Ministry of Education, Beijing University of Chemical Technology, Beijing 100029, China

<sup>3</sup> Chemical Engineering College, Hebei Normal University of Science & Technology, Qinhuangdao 066004, China

Corresponding author: [yangzhebuct@163.com](mailto:yangzhebuct@163.com) (Zhe Yang) & [2021400048@buct.edu.cn](mailto:2021400048@buct.edu.cn) (Nan Hu)

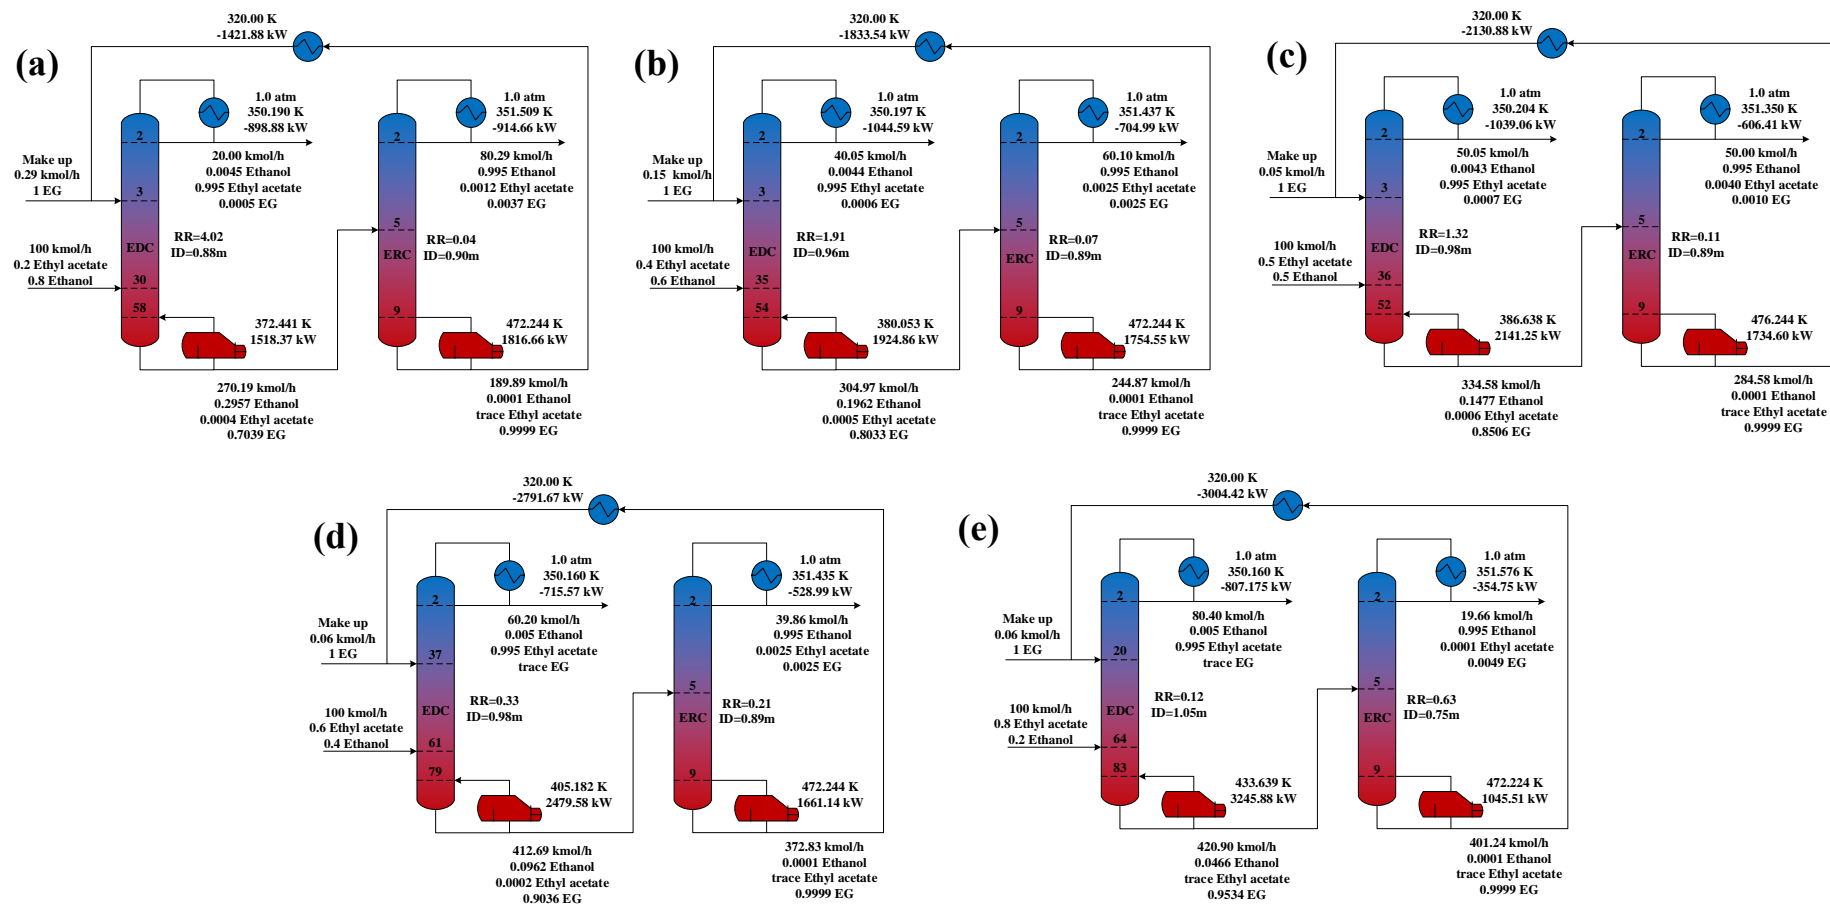

**Figure S1** Optimization results of extractive distillation schemes using EG as the entrainer with stream information for separating ethyl acetate-ethanol, and the feed composition is (a) 0.2-0.8, (b) 0.4-0.6, (c) 0.5-0.5, (d) 0.6-0.4, and (e) 0.8-0.2.

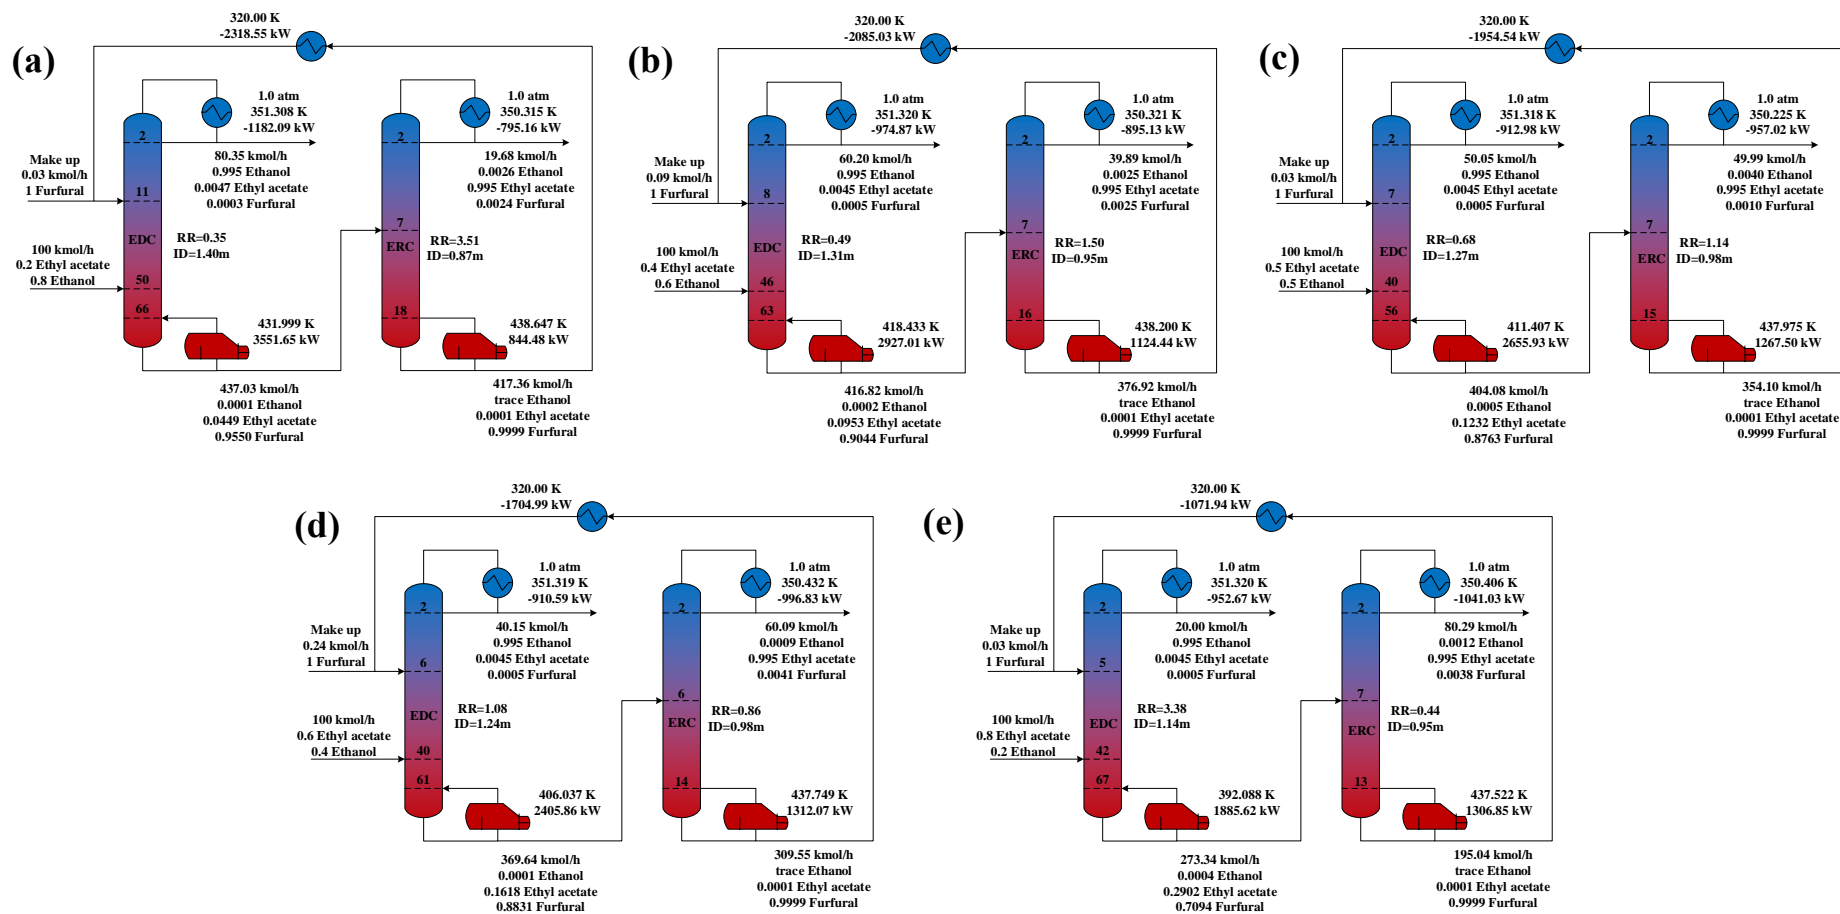

**Figure S2** Optimization results of extractive distillation schemes using furfural as the entrainer with stream information for separating ethyl acetate-ethanol, and the feed composition is (a) 0.2-0.8, (b) 0.4-0.6, (c) 0.5-0.5, (d) 0.6-0.4, and (e) 0.8-0.2.

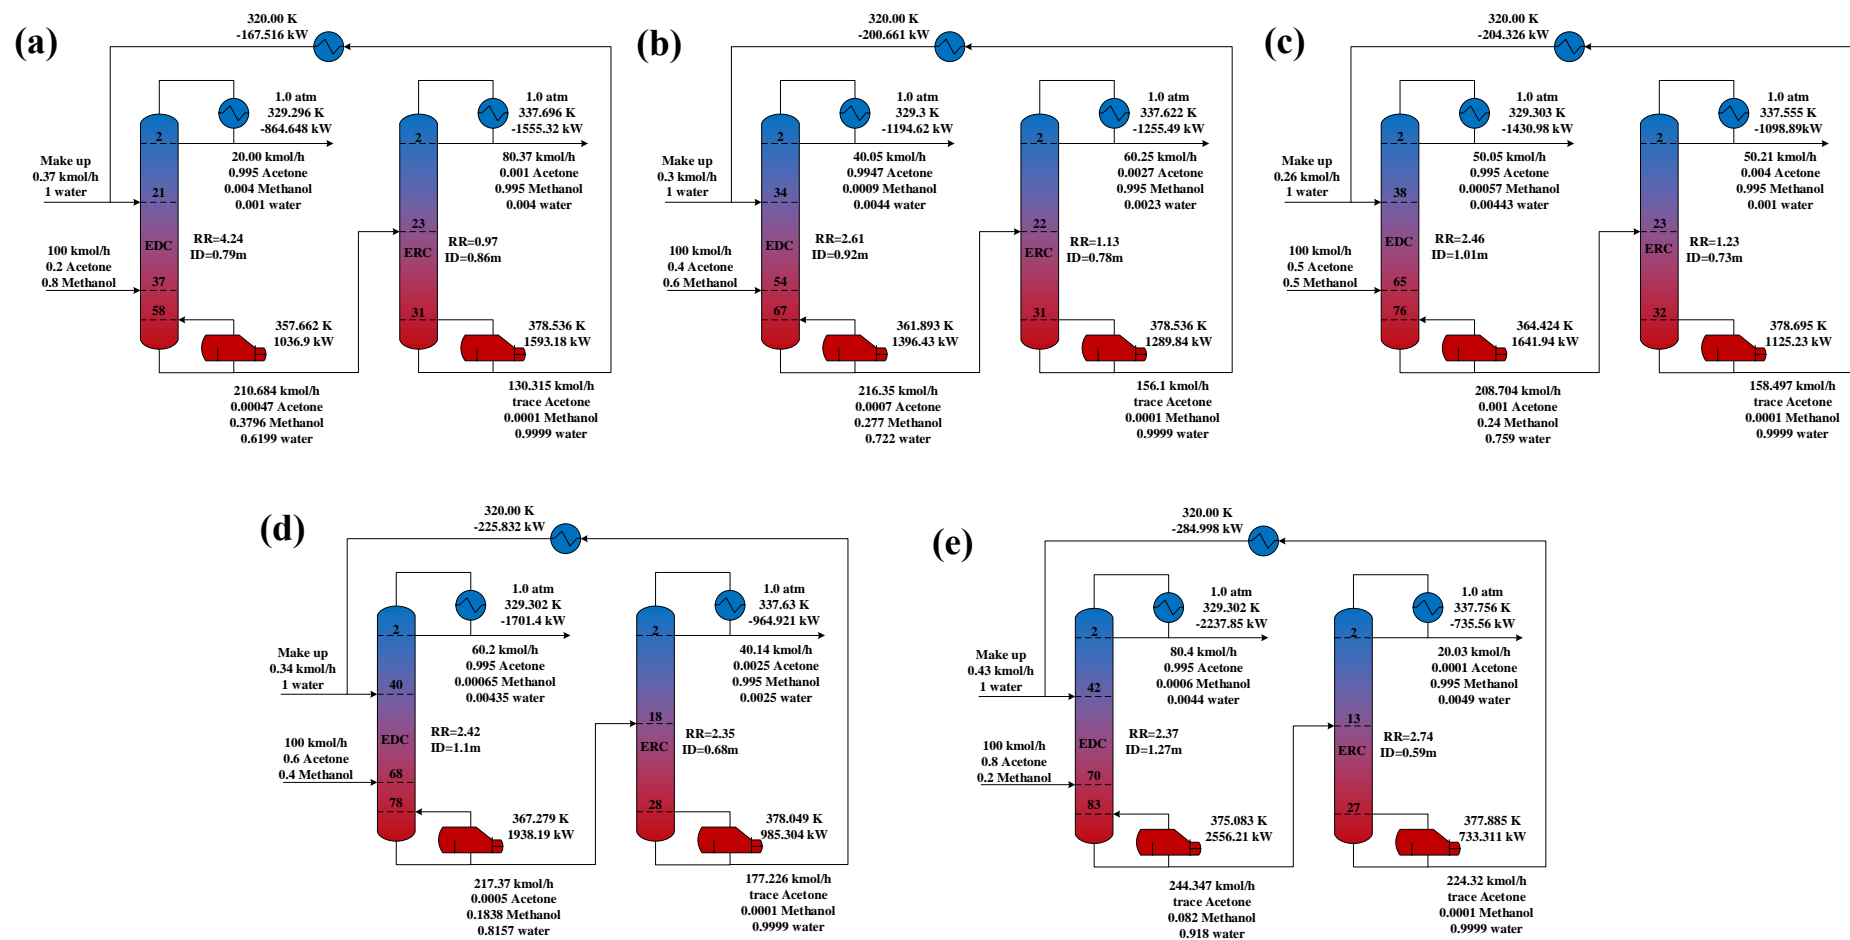

**Figure S3** Optimization results of extractive distillation schemes using water as the entrainer with stream information for separating acetone-methanol, and the feed composition is (a) 0.2-0.8, (b) 0.4-0.6, (c) 0.5-0.5, (d) 0.6-0.4, and (e) 0.8-0.2.

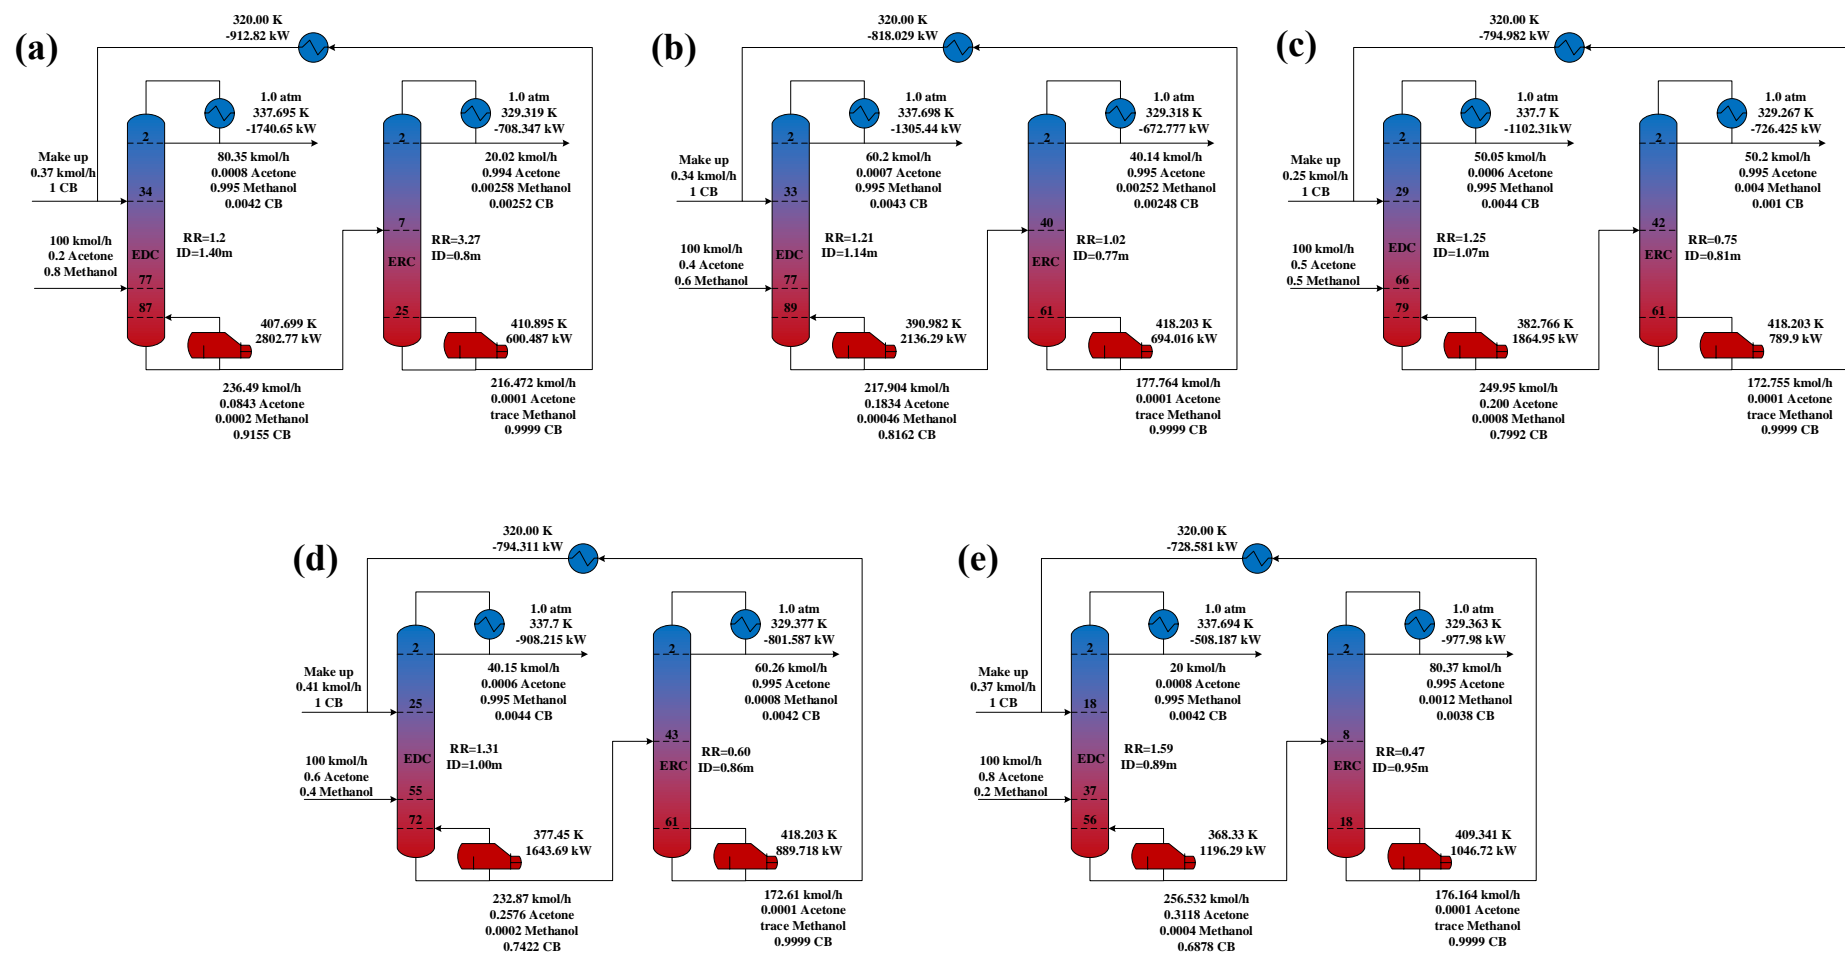

**Figure S4** Optimization results of extractive distillation schemes using CB as the entrainer with stream information for separating acetone-methanol, and the feed composition is (a) 0.2-0.8, (b) 0.4-0.6, (c) 0.5-0.5, (d) 0.6-0.4, and (e) 0.8-0.2.

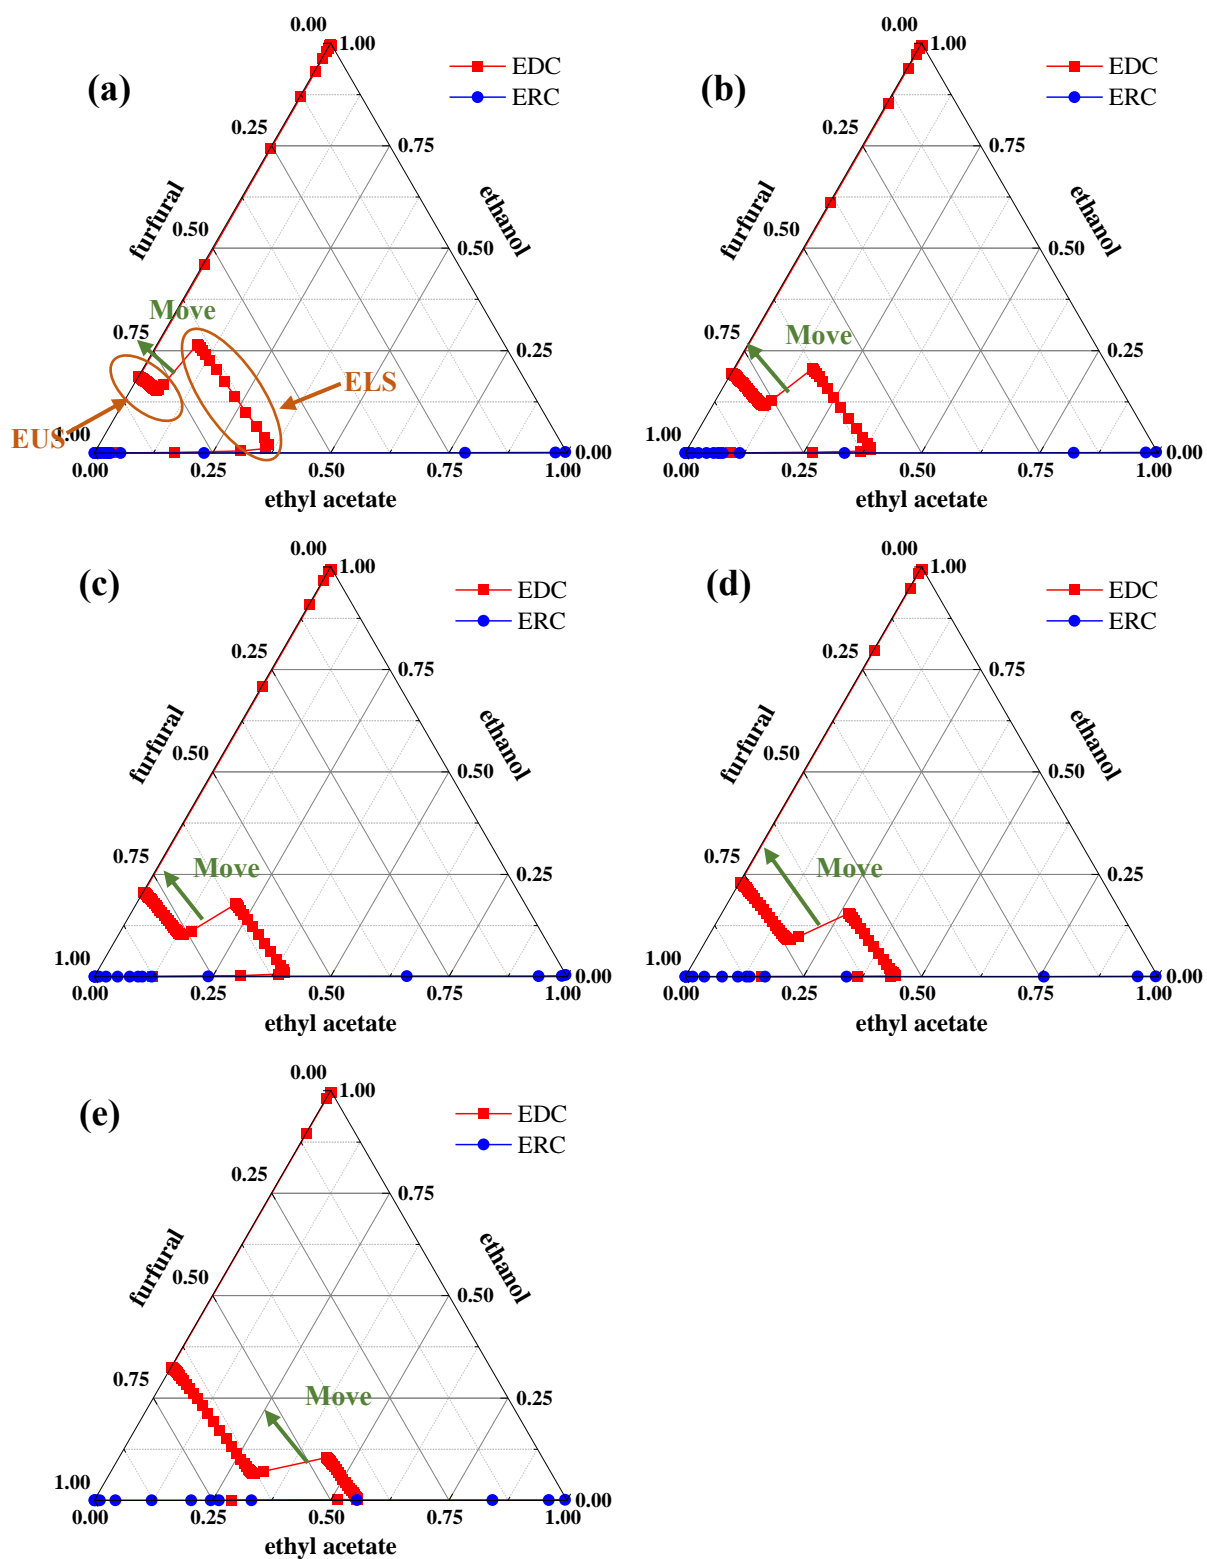

**Figure S5** Composition distribution within the column of extractive distillation schemes using furfural as the entrainer for separating ethyl acetate-ethanol, and the feed composition is (a) 0.2-0.8, (b) 0.4-0.6, (c) 0.5-0.5, (d) 0.6-0.4, and (e) 0.8-0.2.

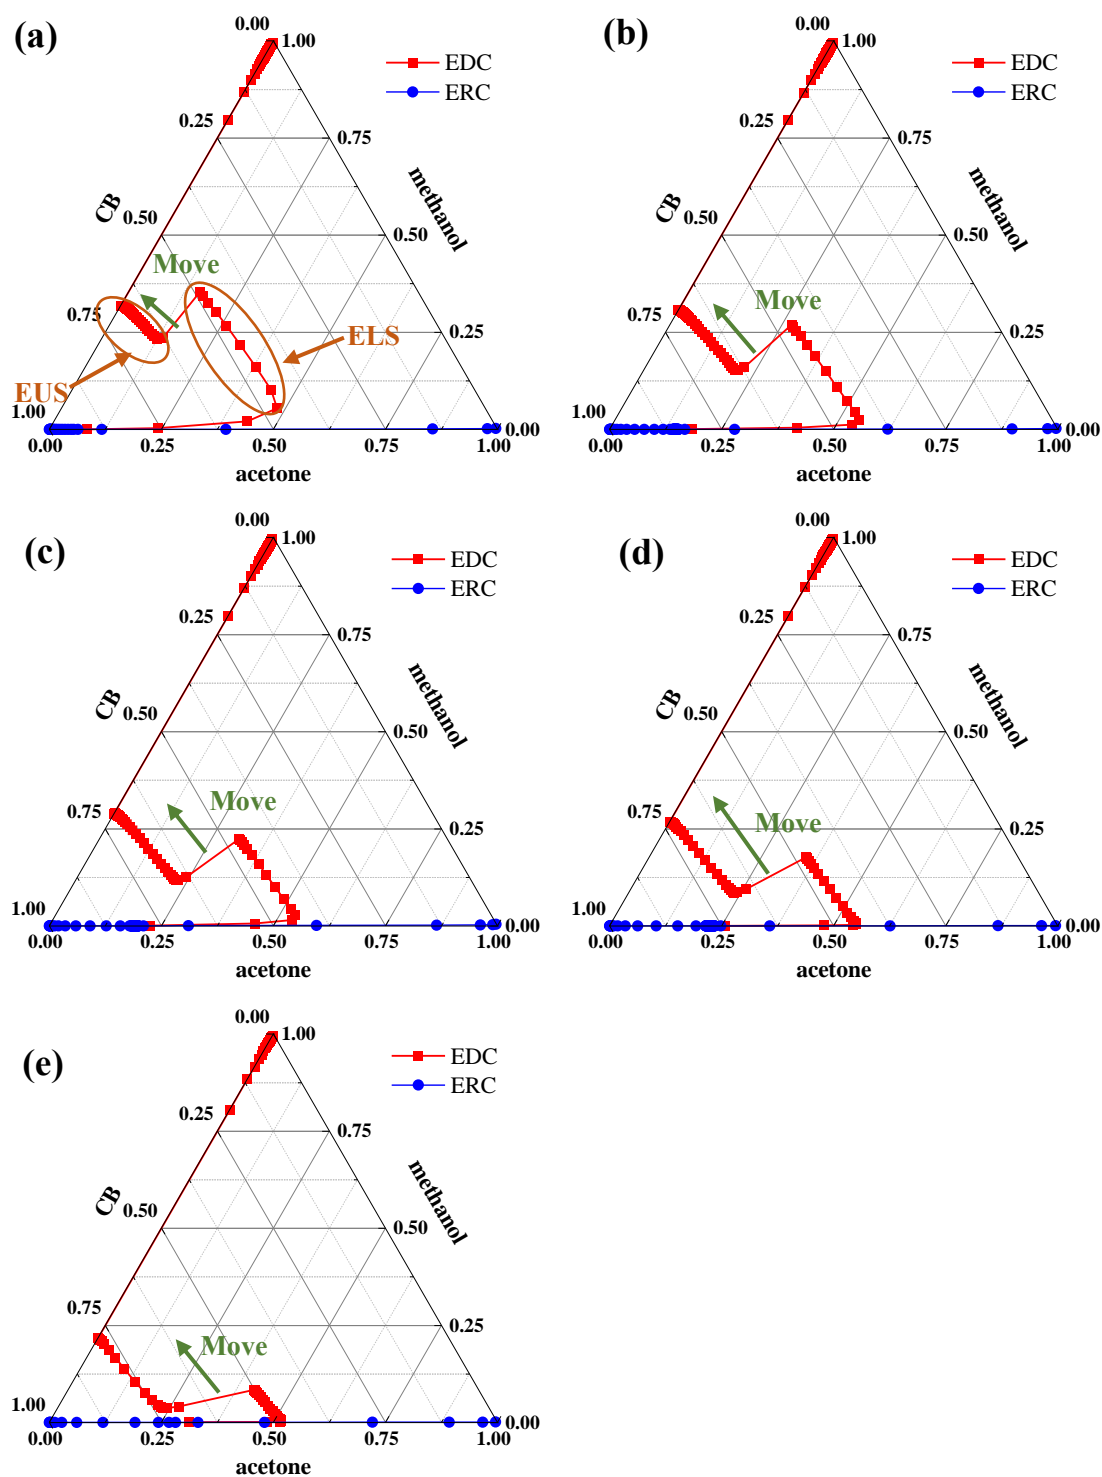

**Figure S6** Composition distribution within the column of extractive distillation schemes using CB as the entrainer for separating acetone-methanol, and the feed composition is (a) 0.2-0.8, (b) 0.4-0.6, (c) 0.5-0.5, (d) 0.6-0.4, and (e) 0.8-0.2.

**Table S1.** The formulas and parameters used for economic optimization. (Hu et al., 2023)

| Parameters                            | Formula or data                                                     | Units                  |
|---------------------------------------|---------------------------------------------------------------------|------------------------|
| <b>Condenser:</b>                     |                                                                     |                        |
| Heat transfer coefficient ( $U_C$ )   | 0.852                                                               | kW/(K·m <sup>2</sup> ) |
| Temperature difference ( $\Delta T$ ) | $T_C - T_0$ (298.15 K)                                              | K                      |
| Heat transfer area ( $A_C$ )          | $Q_C / (U_C \times \Delta T)$                                       | m <sup>2</sup>         |
| Investment costs                      | $(M\&S/280) \times 1609.13 \times A_C^{0.65}$                       | \$                     |
| <b>Reboiler:</b>                      |                                                                     |                        |
| Heat transfer coefficient ( $U_R$ )   | 0.568                                                               | kW/(K·m <sup>2</sup> ) |
| Temperature difference ( $\Delta T$ ) | $T_{LP}$ (433.15 K) - $T_R$                                         | K                      |
| Heat transfer area ( $A_R$ )          | $Q_R / (U_R \times \Delta T)$                                       | m <sup>2</sup>         |
| Investment costs                      | $(M\&S/280) \times 1775.26 \times A_R^{0.65}$                       | \$                     |
| <b>Column vessel:</b>                 |                                                                     |                        |
| $h_{col}$                             | $1.2 \times 0.6096 \times (N_T - 2)$                                | m                      |
| $h_{tray}$                            | $0.6096 \times (N_T - 2)$                                           | m                      |
| $TC_{inst}$                           | $(M\&S/280) \times 97.243 \times D^{1.55} \times h_{tray}$          | \$                     |
| $CSC_{inst}$                          | $(M\&S/280) \times 3919.32 \times D^{1.066} \times h_{col}^{0.802}$ | \$                     |
| Investment costs                      | $TC_{inst} + CSC_{inst}$                                            | \$                     |
| Energy cost (LP steam)                | $7.78 \times 10^{-6}$                                               | \$/kJ                  |
| M&S                                   | 1582.3 (2016)                                                       | —                      |
| Payback period                        | 3                                                                   | year                   |
| TAC                                   | (Total equipment cost / Operating period) + operating cost          | \$/year                |

**References**

Hu, N., Zhang, Y., Hu, X., Gu, J., Xue, J., Li, Q., 2023. Efficient Single-Column Extractive Distillation Process Achieved through Vapor–Liquid Separation of Feed. *Ind. Eng. Chem. Res.*  
<https://doi.org/10.1021/acs.iecr.3c02951>



**Table S2.** Results of correlation with three thermodynamic models for separating ethyl acetate-ethanol.

| system                 | Root mean square deviations |        |        |
|------------------------|-----------------------------|--------|--------|
|                        | UNIQUAC                     | NRTL   | Wilson |
| Ethanol-Ethyl acetate  | 0.0131                      | 0.0135 | 0.0947 |
| Ethanol-EG             | 0.0334                      | 0.0397 | 0.0357 |
| Ethanol-Furfural       | 0.0411                      | 0.0429 | 0.0416 |
| Ethyl acetate-Furfural | 0.0027                      | 0.0045 | 0.0091 |
| Ethanol-PG             | 0.0081                      | 0.0078 | 0.0079 |
| Ethanol-p-Xylene       | 0.0196                      | 0.0203 | 0.0157 |

**Table S3.** Energy consumption of extractive distillation process under different feed compositions for separating ethyl acetate-ethanol: (a) EG and (b) furfural.

| Feed composition<br>(Ethyl acetate-ethanol) | Energy consumption/ kW  |         |         |                              |         |         |
|---------------------------------------------|-------------------------|---------|---------|------------------------------|---------|---------|
|                                             | Positive entrainer (EG) |         |         | Reverse entrainer (Furfural) |         |         |
|                                             | EDC                     | ERC     | EDC+ERC | EDC                          | ERC     | EDC+ERC |
| 0.2-0.8                                     | 1518.37                 | 1816.66 | 3335.03 | 3551.65                      | 844.48  | 4396.13 |
| 0.4-0.6                                     | 1924.86                 | 1754.55 | 3679.41 | 2927.01                      | 1124.44 | 4051.45 |
| 0.5-0.5                                     | 2141.25                 | 1734.6  | 3875.85 | 2655.93                      | 1267.5  | 3923.43 |
| 0.6-0.4                                     | 2479.58                 | 1661.14 | 4140.72 | 2405.86                      | 1312.07 | 3717.93 |
| 0.8-0.2                                     | 3245.88                 | 1045.51 | 4291.39 | 1885.62                      | 1306.85 | 3192.47 |

**Table S4.** Energy consumption of extractive distillation process under different feed compositions for separating acetone-methanol: (a) water and (b) CB.

| Feed composition<br>(Acetone-methanol) | Energy consumption/ kW     |         |          |                        |         |          |
|----------------------------------------|----------------------------|---------|----------|------------------------|---------|----------|
|                                        | Positive entrainer (Water) |         |          | Reverse entrainer (CB) |         |          |
|                                        | EDC                        | ERC     | EDC+ERC  | EDC                    | ERC     | EDC+ ERC |
| 0.2-0.8                                | 1036.9                     | 1593.18 | 2630.08  | 2802.77                | 600.487 | 3403.257 |
| 0.4-0.6                                | 1396.43                    | 1289.84 | 2686.27  | 2136.29                | 694.016 | 2830.306 |
| 0.5-0.5                                | 1641.94                    | 1125.23 | 2767.17  | 1864.95                | 789.9   | 2654.85  |
| 0.6-0.4                                | 1938.19                    | 985.304 | 2923.494 | 1643.69                | 889.718 | 2533.408 |
| 0.8-0.2                                | 2556.21                    | 733.311 | 3289.521 | 1196.29                | 1046.72 | 2243.01  |
